# Supplementary material
Source: PubMed Central journal article supplement (PMC6462077)
Supplement: pnas.1816994116.sapp.pdf [file pnas.1816994116.sapp.pdf]

**Supporting Information** for

5 Dominant words rise to the top by positive frequency-  
dependent selection

Mark Pagel, Mark Beaumont, Andrew Meade, Annemarie Verkerk and Andreea Calude

10 Author for correspondence: Mark Pagel  
Email: [m.pagel@reading.ac.uk](mailto:m.pagel@reading.ac.uk)

**This PDF file includes:**

15 Supporting text  
Fig. S1  
Fig. S2  
Tables S1 to S4  
20 References for SI reference citations

25

## Supporting Information Text

### **Data**

30 *LAMSAS items.* We obtained LAMSAS interview response data from materials made available  
 by the Applied Linguistics department at the University of Groningen  
 (http://www.let.rug.nl/~kleiweg/lamsas/overview/lex.txt) as well as from the Linguistic Atlas  
 Project website (<http://old.lap.uga.edu/>, [http://old.lap.uga.edu/cgi-](http://old.lap.uga.edu/cgi-bin/lapsite.fcgi/lamsas/)  
 35 [bin/lapsite.fcgi/lamsas/](http://old.lap.uga.edu/cgi-bin/lapsite.fcgi/lamsas/)). One hundred meanings were listed in the LAMSAS Handbook(1) as  
 'lexical' or 'grammatical'. From this set, we excluded seven food-related concepts as they  
 seemed to collect responses to a range of concepts rather than a single one, for instance  
 BAKERS BREAD. This left n=93 LAMSAS concepts for analysis (Table S1).

*LAGS items.* We collected LAGS concepts from the Linguistic Atlas Project website  
 40 (<http://old.lap.uga.edu/cgi-bin/lapsite.fcgi/lags/>). There were some discrepancies between  
 the LAGS Technical Index and the files retrieved from the Linguistic Atlas Project website,  
 and where this occurred we gave priority to the files from the Linguistic Atlas Project  
 website. We obtained 345 concepts from LAGS identified as 'lexical' or 'grammatical'. From  
 this set, we excluded twenty concepts that seemed poorly defined by virtue of failing to  
 45 elicit consistent responses, for instance the item POOR WHITES (WHITES' TERMS). This left  
 325 LAGS items (Table S2).

*Filtering criteria.* All n=418 retained LAMSAS and LAGS data were lemmatized (e.g., plurals,  
 such as aprons, were combined with their singular, apron) and inappropriate responses  
 50 were removed. These included responses not belonging to the intended word class (for  
 instance, a verb 'clabbered' for the noun CLABBER), responses where the interviewee was  
 talking about something else (for instance, 'spider webs' for BAKER'S BREAD), when a  
 response was noted down for the wrong concept (for instance, 'pieces' for RIND).

55 We merged some responses and deleted others following the criteria in Table S4, always  
 with a view towards identifying the actual word alternatives that could be thought to be  
 competing within a population of speakers. The single most common action we took was to  
 delete irrelevant context around the key response, such as for 'apron' (LAGS item 0011).  
 Responses included red apron, bib apron and cook's apron, all of which we took to be  
 60 instantiations of the concept 'apron'. Our criteria always reduce rather than create word  
 alternatives. Our merging and exclusion operations affected roughly 1% of the 417,000  
 responses.

*Number of respondents per meaning.* Interviews did not always include all items and  
 65 respondents sometimes failed to give a reply for some meanings or said 'don't know'. The  
 average number of respondents per meaning was  $729 \pm 220$  (range 50 – 1152). For the 914  
 LAGS respondents it was  $669 \pm 147$  (range = 63-905, median = 698), and for the 1162 LAMSAS  
 respondents it was  $963 \pm 292$  (range = 83 – 1152, median = 1057).

70 The number of respondents per meaning does not correlate with model outcomes (all p-  
 values > 0.36) and the distribution of model outcomes is the same when we restrict the

analyses to meanings with > 300 respondents (n=401): *Drift*(LAGS, LAMSAS) :8.7 (8.9,8.6)  
*Frequency-dependent selection*(LAGS, LAMSAS): 18.5 (18.2, 16.1) *Directional selection*(LAGS,  
 LAMSAS): 72.8(72.9,75.3).

75

*Multiple responses.* Most interviewees provided a single word for each meaning but sometimes reported two or more. The interview records do not make it possible to identify the first word a respondent gave for a particular meaning, so we used all responses. This could introduce a degree of non-independence in the data, but this degree is low. For the  
 80 combined data set of n=418 meanings both the median and modal number of responses is 1. The number of responses per respondent ranges across meanings from 1 - 2.36, with an average of  $1.37 \pm 0.27$ . The 1162 individuals interviewed for the LAMSAS project provided an average of  $1.39 \pm 0.24$  responses per individual (range 1 – 1.93) for the 93 items. The 914  
 85 individuals interviewed for LAGS provided an average of  $1.36 \pm 0.28$  responses per individual (range 1 – 2.36). LAMSAS item CLOUDING UP drew the highest number of responses per individual (average = 1.93) and for LAGS it was TROUSERS (2.36).

Among parts of speech, only adjectives drew slightly more responses per individual (mean =  $1.53 \pm 0.26$ ), and there was no relationship of responses per individual either to  
 90 'concreteness' (see *Word Attributes*, below) or to COCA frequencies (see *Frequency of use in Corpus of Contemporary American English*, below).

*Paired LAMSAS-LAGS items.* Sixty-six meanings are found in both LAGS and LAMSAS. The correlation between the number of alternative word forms per meaning for these meanings  
 95 is 0.87 ( $p < 0.0001$ ), and in n=58 (66%) cases they share the same highest frequency word. Other correlations on the summary statistics (see *Summary statistics*, below for definitions) are as follows: (heterozygosity, *H*,  $r = 0.66$ ,  $p < 0.0001$ ; frequency of most common word,  $r = 0.42$ ,  $p < 0.0004$ ; ratio of frequencies of 2nd to 1st word,  $r = 0.21$ ,  $p = 0.09$ ). The correlation between the paired posterior model probabilities was: *FDS*,  $r = 0.37$  ( $p < 0.001$ ), *D*,  $r = 0.18$   
 100 ( $p = 0.075$ ) and for *DS*,  $r = 0.15$  ( $p = 0.11$ ). The correlations are modest because the paired summary statistics themselves have only modest correlations (especially the *2/1 ratio*) and the summary statistics are good predictors of a model's posterior probability: *Drift*:  $R^2 = 0.90$ ; *Directional selection*:  $R^2 = 0.82$ ; *Frequency-dependent selection*:  $R^2 = 0.88$ . These results reinforce the stochastic nature of word-use evolution relatively divorced from  
 105 characteristics of the words themselves (Figure 4, main text).

### **Word and Meaning characteristics**

*Frequency of appearance in Corpus of Contemporary American English (COCA).* We identified the most commonly reported word given for each of the meanings in our sample. We then  
 110 consulted the Corpus of Contemporary American English (COCA(2)), and recorded that word's frequency-of-appearance (written and spoken use), noting its rank-order position in the list. The LAP meanings are drawn from parts of the lexicon that are frequently used in everyday speech and writing compared to the average frequency of use in the COCA (Figure S1): geometric mean of COCA =  $1.49 \pm 6.83$  appearances per million, geometric mean for  
 115 n=368 LAMSAS and LAGS meanings that have a match in the COCA =  $19.16 \pm 16.42$ . COCA frequency does not correlate with any of the models' posterior probabilities.

120 *Pronunciation.* We scored each of the alternative words in a representative sample of 232 of  
 the meanings, comprising 252,506 responses, on four characteristics: *complexity*, *length*,  
 125 *obstruents* and *sonorants*. The n=232 meanings do not differ statistically from the remaining  
 185 meanings on any of the summary statistics or on their distribution among the parts of  
 speech. *Complexity* is the number of words in the reply (some replies took the form of short  
 expressions such as *a little way* or *help yourself*); *length* refers to the number of distinct  
 sounds or phones in the reply; *obstruents* (the number of consonants that obstruct airflow)  
 and *sonorants* (non-obstructive consonants).

130 *Concreteness scores.* We obtained ‘concreteness’ rankings for 40,000 commonly used  
 English words and two-word expressions(3), where concreteness was defined as the extent  
 to which the meaning refers to something that can be experienced directly through the  
 senses (1-5 scale where 5 is concrete and 1 is abstract). We found matches or near-matches  
 in this list to the highest frequency word for n=292 of the meanings in our sample of n=418.  
 The concreteness scores correlate  $r=0.94$  with concreteness ratings obtained from an earlier  
 study of 4291 words(4). Meanings with higher concreteness scores had slightly more  
 respondents: ( $r^2=0.02$ ,  $p=0.0015$ ).

135 *Age of Acquisition.* We recorded the mean age of acquisition(5) for each of our meanings.  
 We found, as above, matches or near matches to n=312 of our meanings.

### **Methods**

140 *Approximate Bayesian Computation.* ABC (6, 7) provides a way to sample from the posterior  
 distribution of a model’s parameters most likely to have given rise to an observed set of  
 data,  $y$  (main text, **Materials and Methods**).

145 *Model estimation.* The set of  $n$  responses for each meaning describes a frequency  
 distribution  $f(y)$  in which the  $k$  different words used to describe that meaning are arranged in  
 rank-order from the word with the largest number of speakers to the fewest (Figure 1, main  
 text). Assume  $f(y)$  arises from a genealogical process according to parameters  $\Theta=(\theta, Z)$ ,  
 where  $\theta$  is the mutation rate and  $Z$  denotes those parameters related to selection (equation  
 1, main text).

150 Given a frequency distribution of alternative words for a given meaning, we use ABC to  
 discover the parameters of  $\Theta$  that are sampled approximately from  $p(\Theta|y)$ . For our  
 purposes,  $\theta$  is an unknown nuisance parameter that the ABC procedure integrates out. The  
 remaining parameters of  $\Theta$  are those related to selection in the frequency-dependent and  
 155 the directional models. In the former case, this is the posterior distribution on  $s$ , and in the  
 latter the posterior estimates of the parameters describing the distribution of fitness values  
 of alternative words  $w_i$ , (note that the  $w_i$  are not themselves distinct parameters and are not  
 estimated. Rather they are assigned to simulated word-tokens (a label within the  
 simulation, not an actual word) at random based on draws from the prior, see below for  
 160 descriptions of the priors).

*Description of priors.* We chose generous priors for the parameters of the models, based on variation we observed in a preliminary inspection of approximately 10% (n=48) of the LAMSAS and LAGS items.

165 *Mutation rate*  $\theta$  (all models):  $\sim \text{Gamma}(5.5, 2.2)$

*Directional selection parameters* for the distribution of  $w_i$  (model DS):  $W_\delta$  (*pdel upper*)  $\sim U(0.75, 1)$ ,  $W_\alpha$  (*pdel lower*)  $\sim U(0, 0.25)$ . These two parameters describe a mixture distribution centred at 1, falling away to the left (deleterious) and right (advantageous) of 1  
 170 in a manner roughly corresponding to exponential decline (8). The mixture distribution provides a rate multiplier by which the current value of  $w_i$  for word  $i$  is changed to a new value according to  $r_i w_i$ . Thus, most multipliers leave the value of  $w_i$  relatively unchanged but some improve it and some make it worse.

175 *Frequency dependent selection parameter*  $s$  (Model FDS):  
 log-normal  $\sim \text{lnN}(-5.44, 0.63)$

*Model selection.* We ran a large number of simulations for each model following the sequential ABC procedure outlined in Beaumont(6, 9) assessing simulated data by a function  
 180  $\rho(S(x_i), S(y))$  measuring the distance of the simulated data ( $x_i$ ) to the observed data. Our inferences are based on 50,000 simulated points from the final round of simulation. Distance is measured on a set of summary statistics  $S(\cdot)$ , with data rejected if  $\rho(S(x_i), S(y)) > \epsilon$ . We chose  $\epsilon$  such that only the top 5% of runs were retained.

185 We use four summary statistics to define the distance measure: number of alternative words, highest word frequency, the ratio of second highest to highest word frequency and heterozygosity ( $H$ ), where  $H$  is defined as

$$H = \frac{\sum_{i=1}^k f_i}{\sum_{i=1}^k f_i - 1} \left( 1 - \frac{\sum_{i=1}^k f_i^2}{(\sum_{i=1}^k f_i)^2} \right)$$

190 and  $f_i$  is the frequency of word  $i$ , and  $k$  is the number of alternative words. For large  $k$  and  $f_i \approx 1/k$ ,  $H \rightarrow 1$ .

*Posterior probability of models.* We compare the three models (drift, directional selection and frequency-dependent selection) by calculating a model's posterior probability in the  
 195 usual way as

$$P(M_i|D) = \frac{P(D|M_i)p(M_i)}{\sum_i P(D|M_i)p(M_i)}$$

where  $P(M_i|D)$  is the probability of the data under model  $i$ , and  $p(M_i)$  is the prior probability of model  $i$ .  $P(D|M_i)$  is calculated as the

200 proportion of simulations in which model  $i$  best describes the summary statistics. In an ABC setting, a model's posterior probability is proportional to the number of simulations (out of a large number) for which the model best matched the  $S(y)$ .

205 Across meanings, the summary statistics predicted the models' posterior probabilities well:  $D$  ( $R^2 = 0.90$ ),  $DS$  ( $R^2= 0.82$ ),  $FDS$  ( $R^2=0.88$ ) showing that the summary statistics do a good job of describing the observed frequency distributions.

**Validation of ABC models**

210 We simulated 100 datasets each under drift, directional selection and positive frequency-dependent selection. We simulated data using the median values of the parameters for  $\theta$ , selection and the prior distribution of weighting terms (DS model) as calculated from each of the models' winners in the real data. We then competed the models in their own and in the others models' datasets.

215 The percentage results for the three models are as follows, with the percentages in bold down the main diagonal identifying correct outcomes.

| <i>Simulation model</i>              | <i>Analysis Model</i> |                                             |                                     | <i>Total</i> |
|--------------------------------------|-----------------------|---------------------------------------------|-------------------------------------|--------------|
|                                      | <i>Drift, n=100</i>   | <i>Frequency-dependent selection, n=100</i> | <i>Directional selection, n=100</i> |              |
| <i>Drift</i>                         | <b>91</b>             | 6                                           | 3                                   | 100          |
| <i>Frequency-dependent selection</i> | 0                     | <b>85</b>                                   | 15                                  | 100          |
| <i>Directional selection</i>         | 3                     | 7                                           | <b>90</b>                           | 100          |

220 In 88.67% of cases the best fitting model corresponds to the model used to simulate the data. Datasets simulated under drift are the most distinctive, differing from the two selection models. Directional selection and frequency-dependent selection can sometimes masquerade as the other process. In particular frequency-dependent selection can sometimes produce results that look like directional selection.

Figure S1

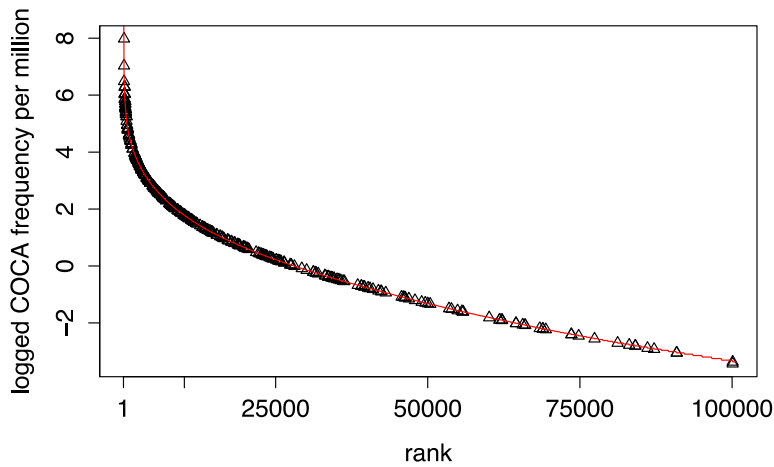

225 **Figure S1:** Position of LAGS and LAMSAS items on the rank order curve of the first 100,000 words in  
 COCA, sorted by frequency. The red curve plots the log-transformed frequencies (per million) of use  
 against rank-order position of every 100<sup>th</sup> word of the first 100,000 most frequent words in COCA  
 ( [www.wordfrequency.info](http://www.wordfrequency.info) ). The black triangles record the rank-order positions in COCA for the  
 n=368 LAMSAS and LAGS meanings whose highest frequency word in the LAP data had a match in the  
 230 COCA (<http://corpus.byu.edu/coca/>). The meanings (Tables S1 and S2) come from a cross-section of  
 the American Corpus, tending towards the more frequently-used end (median rank-order position in  
 the list – first 100,000 words – is 50,000, median rank-order position of n=368 words is 13,000).

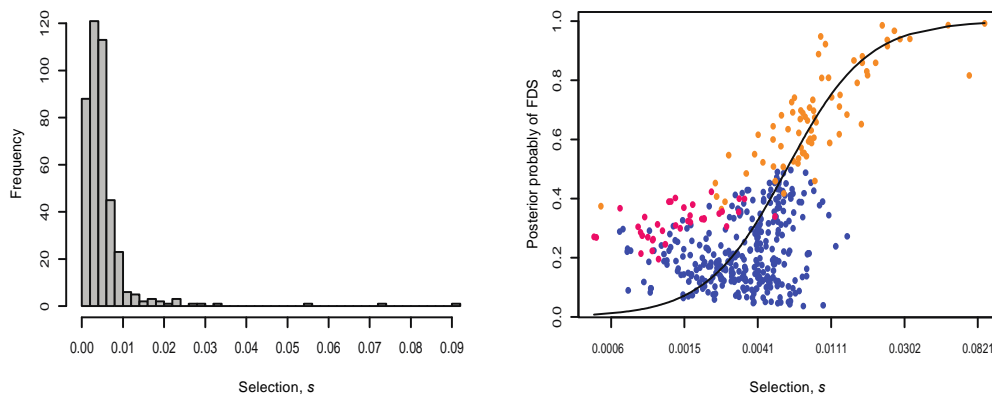

235 **Figure S2:** Left panel: frequency distribution of selection coefficients,  $s$ :  $\text{mean} \pm \text{sd} =$   
 $0.005 \pm 0.007$  (median = 0.004). Right panel: Posterior probability of FDS model against the  
 size of the selection coefficient,  $s$ , showing curvilinear relationship (note: x-axis on log-scale).  
 Points are all FDS posterior probabilities but colour-coded to indicate the model that had the  
 highest posterior probability for that meaning: blue = *DS*, magenta = *D*, mustard = *FDS*. The  
 240 value of  $s$  for which FDS' posterior probability > 0.5 corresponds to  $s \approx 0.006$ .

**Table S1 LAMSAS Meanings**

| <b>meaning/concept</b> | <b>most frequent word</b> | <b>2nd most frequent word</b> | <b>number of alternative words</b> | <b>P(D)</b> | <b>P(FDS)</b> | <b>P(DS)</b> | <b>winning model</b> |
|------------------------|---------------------------|-------------------------------|------------------------------------|-------------|---------------|--------------|----------------------|
| a little ways          | a little ways             | a little piece                | 45                                 | 0           | 0.054         | 0.946        | DS                   |
| afternoon              | afternoon                 | evening                       | 9                                  | 0.137       | 0.133         | 0.729        | DS                   |
| andiron                | andiron(s)                | firedog(s)                    | 41                                 | 0.119       | 0.227         | 0.654        | DS                   |
| attic                  | attic                     | garret                        | 27                                 | 0.03        | 0.089         | 0.881        | DS                   |
| backlog                | backlog                   | log                           | 18                                 | 0.166       | 0.229         | 0.605        | DS                   |
| biscuits               | biscuit                   | rolls                         | 54                                 | 0           | 0.985         | 0.015        | FDS                  |
| boiled eggs            | boiled eggs               | eggs                          | 13                                 | 0           | 0.543         | 0.456        | FDS                  |
| bottom                 | bottom                    | bottom land                   | 66                                 | 0.084       | 0.277         | 0.639        | DS                   |
| brush                  | mop                       | file                          | 11                                 | 0.062       | 0.171         | 0.767        | DS                   |
| bureau                 | bureau                    | dresser                       | 40                                 | 0.014       | 0.18          | 0.806        | DS                   |
| calming down           | lay                       | calm down                     | 117                                | 0.011       | 0.344         | 0.645        | DS                   |
| canal                  | canal                     | ditch                         | 17                                 | 0.009       | 0.146         | 0.845        | DS                   |
| chimney                | chimney                   | smokestack                    | 7                                  | 0.019       | 0.266         | 0.714        | DS                   |
| clabber                | clabber                   | lobbered milk                 | 49                                 | 0.043       | 0.55          | 0.408        | FDS                  |
| cleans up              | clean up                  | clean                         | 13                                 | 0.014       | 0.306         | 0.681        | DS                   |
| clearing up            | clear up                  | clear off                     | 48                                 | 0.019       | 0.134         | 0.847        | DS                   |
| closet                 | closet                    | clothespress                  | 18                                 | 0.004       | 0.179         | 0.816        | DS                   |
| cloudburst             | cloudburst                | downpour                      | 135                                | 0.042       | 0.273         | 0.685        | DS                   |
| clouding up            | clouding up               | threatening                   | 240                                | 0.003       | 0.816         | 0.181        | FDS                  |
| cobbler                | cobbler                   | pie                           | 45                                 | 0.638       | 0.324         | 0.038        | D                    |
| cornbread              | corn bread                | corn pone                     | 55                                 | 0.038       | 0.288         | 0.674        | DS                   |
| cottage cheese         | cottage cheese            | smearcase                     | 47                                 | 0.311       | 0.337         | 0.352        | DS                   |
| dragonfly              | snake doctor              | mosquito hawk                 | 61                                 | 0.358       | 0.339         | 0.302        | D                    |
| dry spell              | dry spell                 | drouth                        | 13                                 | 0.112       | 0.096         | 0.792        | DS                   |



|                     |                      |                  |    |       |       |       |     |
|---------------------|----------------------|------------------|----|-------|-------|-------|-----|
| food                | food                 | vittle           | 15 | 0.098 | 0.167 | 0.735 | DS  |
| fortnight           | fortnight            | two weeks        | 8  | 0.135 | 0.221 | 0.644 | DS  |
| from the south      | from the south       | to the southward | 23 | 0.003 | 0.322 | 0.675 | DS  |
| frost               | frost                | freeze           | 23 | 0.017 | 0.169 | 0.814 | DS  |
| froze over          | froze over           | froze            | 36 | 0     | 0.043 | 0.957 | DS  |
| furniture           | furniture            | plunder          | 16 | 0     | 0.75  | 0.25  | FDS |
| garden              | garden               | patch            | 7  | 0     | 0.859 | 0.141 | FDS |
| going on            | going on             | out              | 7  | 0.014 | 0.243 | 0.743 | DS  |
| good day            | good day             | goodbye          | 10 | 0.019 | 0.132 | 0.849 | DS  |
| gully               | gully                | gutter           | 42 | 0.003 | 0.406 | 0.591 | DS  |
| half past seven     | half past            | half after       | 16 | 0.013 | 0.274 | 0.713 | DS  |
| he died with        | died with            | died of          | 8  | 0.125 | 0.12  | 0.755 | DS  |
| help yourself       | help yourself        | have some        | 12 | 0     | 0.664 | 0.336 | FDS |
| hog pen             | hog pen              | pig pen          | 55 | 0.003 | 0.188 | 0.809 | DS  |
| hominy              | hominy               | hulled corn      | 13 | 0.017 | 0.225 | 0.758 | DS  |
| i dont care for any | don't care for (any) | no thank you     | 38 | 0.004 | 0.398 | 0.599 | DS  |
| kitchen             | kitchen              | cook room        | 11 | 0.017 | 0.314 | 0.67  | DS  |
| lightwood           | lightwood            | lighterd         | 42 | 0.378 | 0.306 | 0.317 | D   |
| make some coffee    | make (coffee)        | boil (coffee)    | 23 | 0.029 | 0.202 | 0.769 | DS  |
| mantel              | mantel               | mantelpiece      | 19 | 0.228 | 0.307 | 0.465 | DS  |
| marsh               | marsh                | meadow           | 26 | 0     | 0.881 | 0.119 | FDS |
| meadow              | meadow               | swale            | 51 | 0     | 0.519 | 0.481 | FDS |
| molasses            | molasses             | sorghum          | 17 | 0     | 0.791 | 0.209 | FDS |
| mop                 | mop                  | scrub            | 8  | 0.095 | 0.083 | 0.823 | DS  |
| mush                | mush                 | pudding          | 28 | 0     | 0.507 | 0.492 | FDS |
| my wife             | my wife              | my lady          | 24 | 0.001 | 0.451 | 0.548 | DS  |
| nice day            | pretty day           | nice day         | 57 | 0.181 | 0.285 | 0.534 | DS  |
| northeast           | northeast            | northeaster      | 7  | 0.004 | 0.411 | 0.585 | DS  |

|                    |                     |                     |     |       |       |       |     |
|--------------------|---------------------|---------------------|-----|-------|-------|-------|-----|
| northwest          | northwest           | northern            | 11  | 0.091 | 0.186 | 0.723 | DS  |
| over there         | over yonder         | over there/here     | 102 | 0.007 | 0.162 | 0.831 | DS  |
| pallet             | pallet              | bunk                | 21  | 0.02  | 0.216 | 0.763 | DS  |
| pancakes           | pancake             | battercake          | 58  | 0.437 | 0.4   | 0.163 | D   |
| parlor             | parlor              | living room         | 20  | 0.556 | 0.245 | 0.199 | D   |
| poached            | poached (egg)       | coddled (egg)       | 19  | 0     | 0.859 | 0.141 | FDS |
| porch              | porch               | piazza              | 23  | 0.134 | 0.233 | 0.633 | DS  |
| quarter to eleven  | quarter to (eleven) | quarter of (eleven) | 16  | 0.174 | 0.204 | 0.621 | DS  |
| quilt              | quilt               | comfort             | 19  | 0.128 | 0.149 | 0.723 | DS  |
| rancid             | rancid              | strong              | 37  | 0.085 | 0.161 | 0.754 | DS  |
| rind               | skin                | rind                | 9   | 0.075 | 0.073 | 0.852 | DS  |
| rising             | rising              | raising             | 75  | 0.173 | 0.616 | 0.211 | FDS |
| sauce              | sauce               | dip                 | 8   | 0.14  | 0.164 | 0.697 | DS  |
| shades             | shades              | curtains            | 12  | 0.286 | 0.188 | 0.525 | DS  |
| shut the door      | shut                | close               | 17  | 0.003 | 0.312 | 0.685 | DS  |
| sit down           | sit down            | set down            | 28  | 0.061 | 0.128 | 0.811 | DS  |
| snack              | snack               | lunch               | 37  | 0.073 | 0.121 | 0.806 | DS  |
| soda pop           | soft drink          | pop                 | 10  | 0.295 | 0.23  | 0.474 | DS  |
| sofa               | sofa                | lounge              | 25  | 0.126 | 0.374 | 0.5   | DS  |
| southeast wind     | southeast wind      | southeast           | 16  | 0.057 | 0.165 | 0.778 | DS  |
| southwest wind     | southwest wind      | southwest           | 15  | 0.05  | 0.241 | 0.709 | DS  |
| spelled me         | spelled me          | spelled (me) off    | 4   | 0.022 | 0.064 | 0.914 | DS  |
| spoiled            | spoilt              | tainted             | 20  | 0.002 | 0.425 | 0.573 | DS  |
| stairs             | stairs              | stairsteps          | 14  | 0.499 | 0.214 | 0.287 | D   |
| steady drizzle     | steady drizzle      | shower              | 62  | 0.013 | 0.356 | 0.631 | DS  |
| sunday before last | sunday before last  | sunday week         | 40  | 0.109 | 0.429 | 0.462 | DS  |
| sunday week        | Sunday week         | Sunday after next   | 38  | 0.016 | 0.113 | 0.871 | DS  |
| sundown            | sundown             | sunset              | 12  | 0.044 | 0.106 | 0.85  | DS  |

|                 |                 |                        |    |       |       |       |     |
|-----------------|-----------------|------------------------|----|-------|-------|-------|-----|
| sunup           | sunup           | sunrise                | 12 | 0.084 | 0.144 | 0.772 | DS  |
| swamp           | swamp           | bog                    | 37 | 0.002 | 0.421 | 0.577 | DS  |
| syrup           | syrup           | molasses               | 9  | 0.004 | 0.223 | 0.773 | DS  |
| thunderstorm    | thunderstorm    | thundershower          | 39 | 0.349 | 0.333 | 0.318 | D   |
| umbrella        | umbrella        | parasol                | 10 | 0.01  | 0.256 | 0.734 | DS  |
| wardrobe        | wardrobe        | clothespress           | 28 | 0     | 0.622 | 0.378 | FDS |
| warmed up       | warmed over     | warmed up              | 12 | 0.117 | 0.155 | 0.728 | DS  |
| weatherboarding | weatherboarding | clapboard              | 30 | 0.002 | 0.137 | 0.862 | DS  |
| what            | what            | how's that             | 61 | 0.002 | 0.485 | 0.512 | DS  |
| what time is it | what time is it | what time of day is it | 47 | 0     | 0.808 | 0.192 | FDS |
| wheat bread     | bread           | light bread            | 22 | 0.074 | 0.121 | 0.805 | DS  |
| while           | while           | spell                  | 4  | 0.007 | 0.282 | 0.711 | DS  |
| yolk            | yolk            | yelk                   | 6  | 0.391 | 0.271 | 0.338 | D   |

Table S2 LAGS Meanings

| meaning/concept | most frequent word              | 2nd most frequent word                  | number of alternative words | P(D)  | P(FDS) | P(DS) | winning model |
|-----------------|---------------------------------|-----------------------------------------|-----------------------------|-------|--------|-------|---------------|
| a little way    | little piece<br>(away/off/over) | little ways<br>(away/down/off/out/over) | 43                          | 0.263 | 0.389  | 0.348 | FDS           |
| actress         | actress                         | actor [female]                          | 10                          | 0.007 | 0.306  | 0.686 | DS            |
| afraid          | scared                          | afraid                                  | 9                           | 0.221 | 0.297  | 0.482 | DS            |
| afternoon       | afternoon                       | evening                                 | 7                           | 0.075 | 0.089  | 0.836 | DS            |
| andirons        | andirons                        | dog horns                               | 44                          | 0.063 | 0.191  | 0.746 | DS            |
| angry           | mad                             | angry                                   | 42                          | 0.003 | 0.179  | 0.818 | DS            |
| appendicitis    | appendicitis                    | appendix [sic]                          | 34                          | 0     | 0.808  | 0.192 | FDS           |
| apple core      | core                            | seeds [sic]                             | 14                          | 0     | 0.602  | 0.398 | FDS           |
| apron           | apron                           | smock                                   | 9                           | 0.001 | 0.617  | 0.382 | FDS           |
| attic           | attic                           | loft                                    | 32                          | 0     | 0.103  | 0.897 | DS            |
| axle            | axle                            | tongue [sic]                            | 5                           | 0     | 0.992  | 0.008 | FDS           |
| baby carriage   | carriage                        | baby carriage                           | 20                          | 0.292 | 0.209  | 0.499 | DS            |
| backlog         | log                             | backlog                                 | 27                          | 0.058 | 0.121  | 0.821 | DS            |
| barnyard        | lot                             | barnyard                                | 18                          | 0.063 | 0.133  | 0.803 | DS            |
| barrow          | barrow                          | bar                                     | 23                          | 0.024 | 0.125  | 0.85  | DS            |
| bawl calf       | bleat                           | bawl                                    | 26                          | 0.247 | 0.257  | 0.496 | DS            |
| bedroom         | bedroom                         | room                                    | 12                          | 0     | 0.711  | 0.289 | FDS           |
| bedspread       | bedspread                       | spread                                  | 11                          | 0.384 | 0.224  | 0.392 | DS            |
| belly buster    | belly buster                    | belly bust                              | 33                          | 0     | 0.634  | 0.366 | FDS           |
| best man        | best man                        | groom maid                              | 15                          | 0     | 0.658  | 0.342 | FDS           |
| biscuits        | biscuits                        | biscuit bread                           | 7                           | 0     | 0.651  | 0.349 | FDS           |

|               |                             |                          |     |       |       |       |     |
|---------------|-----------------------------|--------------------------|-----|-------|-------|-------|-----|
| black coffee  | black (coffee)              | straight (coffee)        | 29  | 0.088 | 0.213 | 0.699 | DS  |
| blood pudding | blood pudding               | blood sausage            | 19  | 0.116 | 0.231 | 0.653 | DS  |
| boil noun     | boil                        | rising                   | 22  | 0.06  | 0.149 | 0.792 | DS  |
| bottom        | bottomland                  | bottom                   | 84  | 0     | 0.212 | 0.788 | DS  |
| boyfriend     | boyfriend                   | beau                     | 42  | 0.037 | 0.27  | 0.693 | DS  |
| bridesmaid    | bridesmaid                  | maid of honor            | 30  | 0.032 | 0.133 | 0.835 | DS  |
| bucket wooden | bucket                      | wooden bucket            | 6   | 0.231 | 0.224 | 0.545 | DS  |
| bull          | bull                        | male                     | 49  | 0.002 | 0.369 | 0.628 | DS  |
| bureau        | dresser                     | chest of drawers         | 32  | 0.121 | 0.19  | 0.689 | DS  |
| butter bean   | butter bean                 | lima                     | 34  | 0.006 | 0.065 | 0.929 | DS  |
| calming down  | dying down                  | calming down             | 110 | 0.102 | 0.459 | 0.439 | FDS |
| canal         | ditch                       | canal                    | 26  | 0.017 | 0.168 | 0.815 | DS  |
| candle fly    | moth                        | candle fly               | 33  | 0.011 | 0.115 | 0.874 | DS  |
| cantaloupe    | cantaloupe                  | mushmelon                | 8   | 0.158 | 0.224 | 0.618 | DS  |
| car           | car                         | automobile               | 23  | 0.005 | 0.083 | 0.912 | DS  |
| castrate      | castrate                    | cut                      | 65  | 0.009 | 0.383 | 0.608 | DS  |
| cattle        | stock(s)                    | cattle                   | 6   | 0.303 | 0.374 | 0.322 | FDS |
| caught a cold | caught (a/the/that)<br>cold | took (a/this) cold       | 6   | 0.407 | 0.269 | 0.325 | D   |
| cemetery      | cemetery                    | graveyard                | 38  | 0.001 | 0.049 | 0.95  | DS  |
| cherry seed   | seed                        | pit                      | 18  | 0.027 | 0.078 | 0.895 | DS  |
| chicken coop  | coop                        | chicken house            | 68  | 0.212 | 0.333 | 0.455 | DS  |
| children      | children                    | kids                     | 19  | 0.066 | 0.103 | 0.832 | DS  |
| chilly        | chilly                      | cool                     | 31  | 0.068 | 0.223 | 0.709 | DS  |
| chimney       | chimney                     | chimley                  | 6   | 0.106 | 0.118 | 0.776 | DS  |
| church music  | music                       | singing                  | 16  | 0     | 0.684 | 0.316 | FDS |
| civil war     | Civil War                   | War between the State(s) | 56  | 0     | 0.138 | 0.862 | DS  |
| clabber       | clabber                     | buttermilk               | 11  | 0.203 | 0.254 | 0.543 | DS  |

|                  |               |                 |     |       |       |       |     |
|------------------|---------------|-----------------|-----|-------|-------|-------|-----|
| clean up         | clean up      | clean           | 53  | 0.123 | 0.296 | 0.58  | DS  |
| clear up         | clear up      | clear off       | 75  | 0.071 | 0.645 | 0.284 | FDS |
| cleared the land | cleared       | cleaned up      | 62  | 0     | 0.536 | 0.464 | FDS |
| cliff            | cliff         | bluff           | 36  | 0.001 | 0.432 | 0.567 | DS  |
| cling peach      | cling (peach) | clingstone      | 27  | 0.429 | 0.32  | 0.251 | D   |
| cloth sack       | sack          | bag             | 14  | 0.229 | 0.299 | 0.472 | DS  |
| clothes basket   | basket        | clothes basket  | 25  | 0.016 | 0.129 | 0.855 | DS  |
| cloudburst       | downpour      | rain            | 124 | 0.05  | 0.39  | 0.56  | DS  |
| clouding up      | changing      | threatening     | 182 | 0.045 | 0.743 | 0.213 | FDS |
| clumsy           | clumsy        | awkward         | 94  | 0     | 0.377 | 0.623 | DS  |
| coal bucket      | coal bucket   | scuttle         | 22  | 0.371 | 0.3   | 0.329 | D   |
| cobbler          | cobbler       | pie             | 45  | 0.007 | 0.128 | 0.865 | DS  |
| coffin           | casket        | coffin          | 9   | 0.102 | 0.075 | 0.823 | DS  |
| cork             | cork          | stopper         | 12  | 0.048 | 0.059 | 0.894 | DS  |
| corn crib        | crib          | corncrib        | 20  | 0.027 | 0.068 | 0.905 | DS  |
| corn silk        | silk          | corn silk       | 16  | 0.009 | 0.339 | 0.652 | DS  |
| cottage cheese   | cottage [sic] | cheese          | 24  | 0.016 | 0.395 | 0.589 | DS  |
| county seat      | county seat   | seat            | 21  | 0     | 0.497 | 0.503 | DS  |
| courting         | courting      | dating          | 62  | 0.025 | 0.453 | 0.522 | DS  |
| cow barn         | barn          | shed            | 28  | 0.402 | 0.37  | 0.228 | D   |
| cow pen          | cow pen       | pen             | 28  | 0.151 | 0.375 | 0.474 | DS  |
| crawfish         | crawfish      | crawdad         | 16  | 0.034 | 0.182 | 0.784 | DS  |
| crawl            | crawls        | creeps          | 3   | 0.002 | 0.454 | 0.544 | DS  |
| creek tidal      | bayou         | creek           | 40  | 0.36  | 0.355 | 0.285 | D   |
| crowd whole      | bunch         | crowd           | 58  | 0.098 | 0.422 | 0.48  | DS  |
| dance            | dance         | party           | 47  | 0     | 0.741 | 0.259 | FDS |
| deaf             | deaf          | hard of hearing | 2   | 0.006 | 0.178 | 0.816 | DS  |
| devil            | devil         | Satan           | 50  | 0.012 | 0.129 | 0.86  | DS  |

|                 |                   |                              |    |       |       |       |     |
|-----------------|-------------------|------------------------------|----|-------|-------|-------|-----|
| died crude      | kicked the bucket | croaked                      | 64 | 0     | 0.922 | 0.078 | FDS |
| died neutral    | died              | passed into the great beyond | 53 | 0.01  | 0.1   | 0.889 | DS  |
| dish towel      | dish towel        | drying cloth                 | 25 | 0.466 | 0.292 | 0.243 | D   |
| dishrag         | dishrag           | dishcloth                    | 19 | 0.057 | 0.187 | 0.756 | DS  |
| dock            | dock              | wharf                        | 35 | 0.11  | 0.359 | 0.531 | DS  |
| dont remember   | don't remember    | can't remember               | 20 | 0.249 | 0.311 | 0.44  | DS  |
| double tree     | doubletree        | double singletree            | 18 | 0     | 0.554 | 0.445 | FDS |
| dry spell       | drought           | dry spell                    | 11 | 0.073 | 0.116 | 0.811 | DS  |
| education       | education         | learning                     | 4  | 0.02  | 0.166 | 0.814 | DS  |
| employer        | boss              | mister                       | 36 | 0.368 | 0.349 | 0.283 | D   |
| ewe             | ewe               | doe                          | 20 | 0     | 0.669 | 0.331 | FDS |
| father          | father            | daddy                        | 14 | 0.412 | 0.286 | 0.303 | D   |
| faucet          | faucet            | spicket                      | 23 | 0.196 | 0.283 | 0.521 | DS  |
| feeding time    | feeding time      | time to feed                 | 29 | 0.05  | 0.352 | 0.598 | DS  |
| fell out of bed | fell out of bed   | fell off the bed             | 19 | 0.081 | 0.129 | 0.79  | DS  |
| fetch           | go get            | bring                        | 16 | 0.379 | 0.338 | 0.283 | D   |
| field patch     | field             | patch                        | 25 | 0.005 | 0.051 | 0.944 | DS  |
| first grade     | first grade       | primer                       | 34 | 0.057 | 0.419 | 0.525 | DS  |
| flambeau        | torch             | flambeau                     | 54 | 0.077 | 0.299 | 0.624 | DS  |
| food            | food              | victuals                     | 12 | 0.058 | 0.183 | 0.759 | DS  |
| fool            | fool              | idiot                        | 68 | 0     | 0.588 | 0.412 | FDS |
| fowl            | fowl(s)           | chicken(s)                   | 12 | 0.226 | 0.241 | 0.532 | DS  |
| fox squirrel    | fox squirrel      | red squirrel                 | 21 | 0.013 | 0.131 | 0.856 | DS  |
| freestone peach | freestone (peach) | clear seed (peach)           | 42 | 0.004 | 0.097 | 0.899 | DS  |
| frost           | frost             | freeze                       | 3  | 0.146 | 0.09  | 0.764 | DS  |
| froze over      | froze over        | froze                        | 16 | 0.046 | 0.076 | 0.879 | DS  |
| funeral         | funeral           | burial                       | 24 | 0     | 0.698 | 0.302 | FDS |
| funnel          | funnel            | faucet                       | 11 | 0     | 0.83  | 0.17  | FDS |

|                 |                      |                         |     |       |       |       |     |
|-----------------|----------------------|-------------------------|-----|-------|-------|-------|-----|
| furniture       | furniture            | suite                   | 14  | 0     | 0.554 | 0.446 | FDS |
| gap             | gap                  | pass                    | 17  | 0.123 | 0.159 | 0.718 | DS  |
| garden          | garden               | patch                   | 8   | 0.001 | 0.426 | 0.573 | DS  |
| get rid of      | get rid of           | get shut of             | 5   | 0.038 | 0.121 | 0.841 | DS  |
| ghosts          | ghosts               | haunts                  | 35  | 0.04  | 0.194 | 0.765 | DS  |
| girlfriend      | girl friend          | sweetheart              | 54  | 0     | 0.215 | 0.785 | DS  |
| gloomy day      | cloudy (day/weather) | gloomy (day)            | 75  | 0.205 | 0.6   | 0.196 | FDS |
| go              | go to                | get to                  | 6   | 0.052 | 0.097 | 0.851 | DS  |
| goal            | base                 | home base               | 17  | 0.115 | 0.264 | 0.62  | DS  |
| good day        | good-bye             | good day                | 29  | 0.078 | 0.158 | 0.764 | DS  |
| good natured    | good-natured         | pleasant                | 102 | 0.372 | 0.417 | 0.211 | FDS |
| good night      | good night           | good evening            | 14  | 0     | 0.606 | 0.394 | FDS |
| got married     | married              | hitched                 | 30  | 0     | 0.192 | 0.808 | DS  |
| got sick        | got sick             | took sick               | 11  | 0.099 | 0.144 | 0.757 | DS  |
| grandfather     | grandfather          | grandpa                 | 47  | 0.029 | 0.151 | 0.82  | DS  |
| grandmother     | grandmother          | grandma                 | 52  | 0.003 | 0.12  | 0.876 | DS  |
| grasshopper     | grasshopper          | hoppergrass             | 18  | 0.003 | 0.178 | 0.819 | DS  |
| gray squirrel   | squirrel             | gray squirrel           | 26  | 0.014 | 0.091 | 0.894 | DS  |
| green onions    | green onions         | shallots                | 40  | 0.28  | 0.364 | 0.356 | FDS |
| grindstone      | grind stone          | grind rock              | 39  | 0.004 | 0.119 | 0.876 | DS  |
| grits           | grits                | hominy                  | 6   | 0     | 0.94  | 0.06  | FDS |
| grove           | grove                | orchard                 | 26  | 0.012 | 0.154 | 0.834 | DS  |
| gully           | gully                | ditch                   | 41  | 0.006 | 0.229 | 0.765 | DS  |
| gutters         | gutters              | troughs                 | 13  | 0.008 | 0.331 | 0.662 | DS  |
| half past seven | (seven, etc.)-thirty | half past (seven, etc.) | 16  | 0.029 | 0.081 | 0.89  | DS  |
| happy new year  | Happy New Year       | New Year's Gift         | 9   | 0.004 | 0.358 | 0.638 | DS  |
| harmonica       | harmonica            | harp                    | 14  | 0.429 | 0.223 | 0.348 | D   |
| harness         | harness (the horse)  | hitch (the horse)       | 13  | 0.043 | 0.104 | 0.854 | DS  |



|                     |                 |                                    |    |       |       |       |     |
|---------------------|-----------------|------------------------------------|----|-------|-------|-------|-----|
| harrow              | harrow          | disc (harrow/harrower)             | 37 | 0.012 | 0.15  | 0.838 | DS  |
| hauling             | hauling         | carrying                           | 14 | 0.002 | 0.451 | 0.547 | DS  |
| haunches            | haunches        | hunkers                            | 37 | 0.176 | 0.253 | 0.572 | DS  |
| haunted house       | haunted house   | ghost house                        | 17 | 0.001 | 0.417 | 0.581 | DS  |
| have a calf         | have a calf/cow | drop a baby/calf                   | 34 | 0.559 | 0.39  | 0.052 | D   |
| hay shed            | hayrack         | hay shed                           | 23 | 0.527 | 0.402 | 0.071 | D   |
| haycock             | windrow         | shock                              | 32 | 0.225 | 0.407 | 0.368 | FDS |
| haystack            | haystack        | stack                              | 27 | 0.004 | 0.136 | 0.86  | DS  |
| help yourself       | help yourself   | serve yourself                     | 22 | 0.007 | 0.398 | 0.595 | DS  |
| hill                | hill            | knob                               | 41 | 0.006 | 0.409 | 0.585 | DS  |
| hog pen             | hogpen          | pen                                | 41 | 0.258 | 0.296 | 0.446 | DS  |
| hominy              | hominy          | homily                             | 3  | 0.003 | 0.168 | 0.829 | DS  |
| hooky               | play hooky      | cut/cutting                        | 54 | 0.003 | 0.682 | 0.315 | FDS |
| hoot owl            | hoot owl        | owl                                | 58 | 0.003 | 0.389 | 0.608 | DS  |
| horseshoes ringtoss | horseshoe(s)    | pitching (the/those)<br>horseshoes | 34 | 0.007 | 0.227 | 0.766 | DS  |
| hull                | hull            | shell                              | 21 | 0.008 | 0.281 | 0.71  | DS  |
| hunker down         | squat           | squat down                         | 67 | 0.231 | 0.522 | 0.247 | FDS |
| intending to        | fixing to       | planning to                        | 19 | 0.469 | 0.313 | 0.218 | D   |
| into ran            | ran into        | ran accross                        | 23 | 0.001 | 0.367 | 0.632 | DS  |
| Jews harp           | Jew's harp      | juice harp                         | 15 | 0.032 | 0.072 | 0.896 | DS  |
| joggling board      | jump board      | springboard                        | 18 | 0.082 | 0.17  | 0.748 | DS  |
| junk                | junk            | trash                              | 34 | 0.007 | 0.453 | 0.54  | DS  |
| junk room           | junk room       | storage room                       | 76 | 0.081 | 0.508 | 0.411 | FDS |
| kerosene            | kerosene        | coal oil                           | 19 | 0.019 | 0.067 | 0.914 | DS  |
| kissing             | kissing         | smooching                          | 52 | 0.02  | 0.192 | 0.788 | DS  |
| kitchen             | kitchen         | stove room                         | 21 | 0     | 0.867 | 0.133 | FDS |
| legal guardian      | guardian        | foster parent                      | 12 | 0.008 | 0.316 | 0.676 | DS  |

|                  |                    |                                  |    |       |       |       |     |
|------------------|--------------------|----------------------------------|----|-------|-------|-------|-----|
| lets out school  | is/was/will be out | turn/turns/turning/turned<br>out | 25 | 0.351 | 0.342 | 0.307 | D   |
| light bulb       | bulb               | light bulb                       | 8  | 0.071 | 0.069 | 0.86  | DS  |
| lightning bug    | lightning bug      | firefly                          | 20 | 0.002 | 0.221 | 0.777 | DS  |
| lightwood        | kindling           | lighterd                         | 51 | 0.218 | 0.547 | 0.235 | FDS |
| like as not      | probably           | like as not                      | 16 | 0.579 | 0.305 | 0.116 | D   |
| liver pudding    | liver pudding      | liverwurst                       | 25 | 0.554 | 0.39  | 0.056 | D   |
| loft             | loft               | hayloft                          | 27 | 0.004 | 0.124 | 0.872 | DS  |
| low animal sound | moo                | low                              | 19 | 0.069 | 0.083 | 0.848 | DS  |
| magnolia         | magnolia (tree)    | cucumber (tree)                  | 8  | 0.001 | 0.353 | 0.646 | DS  |
| make coffee      | make               | boil                             | 12 | 0.374 | 0.259 | 0.367 | D   |
| male hog         | boar               | male hog                         | 27 | 0.04  | 0.356 | 0.604 | DS  |
| mantel           | mantel             | mantelpiece                      | 25 | 0.032 | 0.136 | 0.831 | DS  |
| maple            | maple              | maple tree                       | 11 | 0.048 | 0.162 | 0.79  | DS  |
| marsh            | marsh              | marshland                        | 45 | 0     | 0.215 | 0.785 | DS  |
| meadow           | meadow             | pasture                          | 59 | 0.044 | 0.43  | 0.527 | DS  |
| merry christmas  | Merry Christmas    | Christmas Gift                   | 31 | 0.003 | 0.121 | 0.876 | DS  |
| merry go round   | merry-go-round     | flying jenny                     | 53 | 0.003 | 0.039 | 0.958 | DS  |
| midwife          | midwife            | granny                           | 32 | 0     | 0.135 | 0.865 | DS  |
| minnow           | minnow             | shiner                           | 43 | 0     | 0.674 | 0.326 | FDS |
| molasses         | molasses           | sorghum                          | 14 | 0.023 | 0.211 | 0.767 | DS  |
| mongrel          | feist (dog)        | cur (dog)                        | 55 | 0.503 | 0.423 | 0.074 | D   |
| mother           | mother             | mamma                            | 14 | 0.171 | 0.189 | 0.64  | DS  |
| mountain laurel  | mountain laurel    | laurel                           | 19 | 0.015 | 0.078 | 0.907 | DS  |
| mourning         | mourning           | carrying on                      | 38 | 0     | 0.888 | 0.112 | FDS |
| mush             | mush               | cush                             | 19 | 0.009 | 0.348 | 0.643 | DS  |
| mushroom         | mushroom           | toadstool                        | 11 | 0     | 0.817 | 0.183 | FDS |

|                           |                     |                                    |    |       |       |       |     |
|---------------------------|---------------------|------------------------------------|----|-------|-------|-------|-----|
| nice day                  | clear (day/weather) | beautiful<br>(day/morning/weather) | 41 | 0.54  | 0.38  | 0.081 | D   |
| nickname                  | nickname            | pet name                           | 13 | 0.005 | 0.114 | 0.881 | DS  |
| no kin                    | no kin              | no relation(s)                     | 18 | 0.13  | 0.177 | 0.693 | DS  |
| obligated dont want to be | obligated           | beholden (to no<br>one/nobody)     | 27 | 0.041 | 0.384 | 0.575 | DS  |
| orphan                    | orphan              | motherless/fatherless              | 9  | 0     | 0.588 | 0.411 | FDS |
| over there                | over there/here     | over yonder                        | 27 | 0.392 | 0.309 | 0.299 | D   |
| pancakes                  | pancakes            | Flapjacks                          | 42 | 0.146 | 0.366 | 0.488 | DS  |
| pantry                    | pantry              | Storeroom                          | 34 | 0     | 0.726 | 0.274 | FDS |
| paper bag                 | paper bag           | Bag                                | 17 | 0.498 | 0.263 | 0.24  | D   |
| pasture                   | pasture             | Range                              | 19 | 0     | 0.689 | 0.311 | FDS |
| peach seed                | seed                | Kernel                             | 19 | 0.283 | 0.327 | 0.391 | DS  |
| peaked                    | peaked              | Pale                               | 86 | 0.081 | 0.388 | 0.531 | DS  |
| pick flowers              | pick                | Cut                                | 12 | 0.261 | 0.212 | 0.527 | DS  |
| picket fence              | picket fence        | paling fence                       | 44 | 0.113 | 0.485 | 0.403 | FDS |
| poached egg               | poached (egg)       | coddled (egg)                      | 15 | 0     | 0.936 | 0.064 | FDS |
| poison ivy                | poison ivy          | poison oak                         | 44 | 0.004 | 0.076 | 0.919 | DS  |
| potatoes                  | potatoes            | Irish (potatoes)                   | 26 | 0.026 | 0.096 | 0.878 | DS  |
| pregnant                  | pregnant            | Expecting                          | 59 | 0.021 | 0.321 | 0.658 | DS  |
| pretty well               | fine                | pretty good                        | 99 | 0.024 | 0.337 | 0.638 | DS  |
| proud flesh               | proud flesh         | plowed flesh                       | 17 | 0.003 | 0.46  | 0.538 | DS  |
| public square             | park                | Square                             | 44 | 0.368 | 0.356 | 0.276 | D   |
| pulley bone               | pulley bone         | V bone                             | 22 | 0.016 | 0.05  | 0.934 | DS  |
| purse                     | purse               | pocketbook                         | 30 | 0.036 | 0.174 | 0.79  | DS  |
| pus                       | pus                 | Corruption                         | 21 | 0.021 | 0.154 | 0.825 | DS  |
| push the baby             | push                | Stroll                             | 17 | 0.565 | 0.269 | 0.165 | D   |
| quarter till              | quarter till        | quarter to                         | 29 | 0.114 | 0.184 | 0.701 | DS  |

|                      |               |                  |    |       |       |       |     |
|----------------------|---------------|------------------|----|-------|-------|-------|-----|
| quilt                | quilt         | Comfort          | 13 | 0.03  | 0.204 | 0.765 | DS  |
| rail fence           | rail fence    | Rail             | 73 | 0     | 0.677 | 0.323 | FDS |
| railroad station     | depot         | railroad station | 30 | 0.12  | 0.217 | 0.663 | DS  |
| ram                  | ram           | Buck             | 23 | 0.002 | 0.197 | 0.801 | DS  |
| rancid               | rancid        | Rank             | 43 | 0.396 | 0.452 | 0.151 | FDS |
| rather               | kind of       | Pretty           | 22 | 0.625 | 0.195 | 0.179 | D   |
| ravine               | gully         | Ravine           | 53 | 0.323 | 0.331 | 0.345 | DS  |
| reared               | raise/raised  | rear/reared      | 13 | 0.037 | 0.211 | 0.752 | DS  |
| relatives            | relatives     | kinfolks         | 16 | 0.51  | 0.275 | 0.216 | D   |
| remember             | remember      | member           | 6  | 0.061 | 0.171 | 0.768 | DS  |
| resembles his father | favours       | looks like       | 81 | 0.395 | 0.459 | 0.146 | FDS |
| rheumatism           | arthritis     | rheumatism       | 29 | 0.007 | 0.051 | 0.942 | DS  |
| rhododendron         | rhododendron  | azalea           | 13 | 0.013 | 0.229 | 0.757 | DS  |
| rim                  | rim           | tire             | 19 | 0.061 | 0.13  | 0.808 | DS  |
| rind                 | skin          | rind             | 17 | 0.026 | 0.065 | 0.909 | DS  |
| rising               | picking up    | rising           | 57 | 0.436 | 0.399 | 0.165 | D   |
| roasting ears        | roasting ears | corn             | 32 | 0.045 | 0.121 | 0.834 | DS  |
| rock                 | rock          | stone            | 4  | 0.033 | 0.141 | 0.826 | DS  |
| rock fence           | rock fence    | rock wall        | 12 | 0.378 | 0.367 | 0.255 | D   |
| sample               | sample        | scrap            | 20 | 0.006 | 0.391 | 0.603 | DS  |
| sauce                | sauce         | syrup            | 16 | 0.033 | 0.187 | 0.78  | DS  |
| sawhorse             | sawhorse      | horse            | 96 | 0.005 | 0.215 | 0.78  | DS  |
| scrapple             | scrapple      | hash             | 9  | 0.009 | 0.386 | 0.605 | DS  |
| screech owl          | screech owl   | owl              | 50 | 0.004 | 0.08  | 0.916 | DS  |
| second cutting       | volunteer     | second cutting   | 69 | 0.095 | 0.324 | 0.58  | DS  |
| seesaw               | seesaw        | teeter-totter    | 17 | 0     | 0.526 | 0.474 | FDS |
| setting hen          | setting hen   | setting          | 36 | 0.034 | 0.428 | 0.538 | DS  |
| shades               | shades        | window shades    | 16 | 0.049 | 0.182 | 0.77  | DS  |

|                        |                   |                   |    |       |       |       |     |
|------------------------|-------------------|-------------------|----|-------|-------|-------|-----|
| shafts                 | shafts            | trace             | 14 | 0     | 0.967 | 0.033 | FDS |
| sheaf                  | bundle            | sheaf             | 21 | 0.007 | 0.248 | 0.745 | DS  |
| shell                  | shell             | hull              | 6  | 0.011 | 0.192 | 0.798 | DS  |
| shell verb             | shell             | hull              | 19 | 0     | 0.418 | 0.582 | DS  |
| shin                   | shin(s)           | shinbone          | 15 | 0.019 | 0.13  | 0.851 | DS  |
| shopping               | shopping          | trading           | 8  | 0.011 | 0.164 | 0.825 | DS  |
| shuck                  | shuck (n.)        | husk (n.)         | 19 | 0.01  | 0.251 | 0.739 | DS  |
| shut the door          | shut              | close             | 16 | 0.021 | 0.047 | 0.932 | DS  |
| sic him                | sic (him/it/them) | get (him/it/them) | 29 | 0.011 | 0.145 | 0.844 | DS  |
| sidewalk               | sidewalk          | banquette         | 14 | 0.001 | 0.431 | 0.568 | DS  |
| single tree            | singletree        | swingletree       | 16 | 0.001 | 0.488 | 0.511 | DS  |
| sit down               | sit down          | have a seat       | 21 | 0.111 | 0.226 | 0.663 | DS  |
| skillet                | skillet           | frying pan        | 35 | 0.038 | 0.147 | 0.815 | DS  |
| skunk                  | skunk             | polecat           | 29 | 0.004 | 0.05  | 0.946 | DS  |
| sleepy                 | sleepy            | drowsy            | 23 | 0.001 | 0.156 | 0.842 | DS  |
| slop bucket            | slop bucket       | bucket            | 47 | 0.001 | 0.432 | 0.566 | DS  |
| small predator         | varmint           | rodent            | 13 | 0.003 | 0.49  | 0.507 | DS  |
| snack                  | snack             | lunch             | 37 | 0     | 0.697 | 0.303 | FDS |
| snits                  | dried apples      | dried fruit       | 27 | 0.001 | 0.122 | 0.876 | DS  |
| sofa                   | sofa              | couch             | 23 | 0.276 | 0.28  | 0.443 | DS  |
| somersault             | somersault        | somerset          | 25 | 0.073 | 0.164 | 0.763 | DS  |
| souse                  | souse             | hoghead cheese    | 27 | 0.303 | 0.243 | 0.455 | DS  |
| spanking               | whipping (n)      | spanking (n)      | 54 | 0.003 | 0.088 | 0.91  | DS  |
| spider web             | spider web        | cobweb            | 10 | 0.252 | 0.177 | 0.571 | DS  |
| spoiled meat           | spoilt            | rancid            | 33 | 0.068 | 0.412 | 0.52  | DS  |
| stairs                 | steps             | stairs            | 11 | 0.406 | 0.186 | 0.408 | DS  |
| stallion               | stallion          | stud              | 27 | 0.05  | 0.119 | 0.831 | DS  |
| start when does school | start             | begin             | 12 | 0.165 | 0.191 | 0.644 | DS  |

|                    |                    |                   |    |       |       |       |     |
|--------------------|--------------------|-------------------|----|-------|-------|-------|-----|
| steady drizzle     | drizzle (n.)       | sprinkle (n.)     | 62 | 0.125 | 0.313 | 0.562 | DS  |
| stole              | stole              | took              | 34 | 0.175 | 0.334 | 0.492 | DS  |
| stovepipe or flue  | stovepipe          | flue              | 20 | 0.097 | 0.137 | 0.767 | DS  |
| stranger           | stranger           | foreigner         | 29 | 0.004 | 0.175 | 0.821 | DS  |
| streetcar          | streetcar          | trolley           | 13 | 0.103 | 0.2   | 0.698 | DS  |
| string of beads    | necklace           | beads             | 20 | 0.238 | 0.211 | 0.551 | DS  |
| strong             | strong             | stout             | 55 | 0.002 | 0.109 | 0.888 | DS  |
| stubborn           | stubborn           | hardheaded        | 78 | 0.027 | 0.411 | 0.562 | DS  |
| student            | student            | pupil             | 11 | 0.138 | 0.139 | 0.723 | DS  |
| sumac              | sumac              | poison sumac      | 24 | 0     | 0.63  | 0.37  | FDS |
| sunday before last | Sunday before last | Sunday a week ago | 36 | 0.102 | 0.344 | 0.554 | DS  |
| sunday next week   | Sunday week        | Sunday after next | 41 | 0.008 | 0.262 | 0.73  | DS  |
| sundown            | sundown            | sunset            | 10 | 0.172 | 0.259 | 0.57  | DS  |
| sunup              | sunup              | sunrise           | 14 | 0.348 | 0.291 | 0.361 | DS  |
| swamp              | swamp              | swampland         | 72 | 0     | 0.708 | 0.292 | FDS |
| sweat preterite    | sweated            | perspired         | 4  | 0.112 | 0.096 | 0.791 | DS  |
| sweet potatoes     | sweet potatoes     | yams              | 48 | 0     | 0.036 | 0.964 | DS  |
| sycamore           | sycamore           | buttonwood        | 9  | 0     | 0.986 | 0.014 | FDS |
| syrup              | syrup              | long sweetening   | 6  | 0     | 0.915 | 0.085 | FDS |
| tattletale         | tattletale         | gossip            | 58 | 0     | 0.388 | 0.612 | DS  |
| team of mules      | team (of mules)    | pair (of mules)   | 29 | 0.005 | 0.065 | 0.929 | DS  |
| terrapin           | terrapin           | gopher turtle     | 41 | 0.034 | 0.288 | 0.678 | DS  |
| theater            | theater            | picture show      | 22 | 0.04  | 0.27  | 0.69  | DS  |
| threw              | threw              | chunked           | 17 | 0.014 | 0.159 | 0.827 | DS  |
| thunderstorm       | thunderstorm       | electrical storm  | 28 | 0.113 | 0.149 | 0.738 | DS  |
| tightwad           | tightwad           | miser             | 53 | 0.006 | 0.123 | 0.871 | DS  |
| tired              | tired              | exhausted         | 60 | 0     | 0.692 | 0.308 | FDS |
| toadstool          | toadstool          | frogstool         | 22 | 0.002 | 0.293 | 0.705 | DS  |

|                  |                  |                        |     |       |       |       |     |
|------------------|------------------|------------------------|-----|-------|-------|-------|-----|
| tongue           | tongue           | tree                   | 13  | 0.016 | 0.198 | 0.786 | DS  |
| tote             | tote             | carry                  | 9   | 0.348 | 0.289 | 0.364 | DS  |
| touchy           | touchy           | high-tempered          | 89  | 0.024 | 0.577 | 0.399 | FDS |
| towel            | towel            | drying rag             | 5   | 0     | 0.939 | 0.061 | FDS |
| trousers         | pants            | overalls               | 35  | 0.459 | 0.331 | 0.21  | D   |
| turned him down  | turned him down  | refused him            | 134 | 0.02  | 0.239 | 0.741 | DS  |
| valley           | valley           | gutter [sic]           | 20  | 0     | 0.733 | 0.267 | FDS |
| vase             | vase             | flowerpot              | 37  | 0.002 | 0.105 | 0.893 | DS  |
| vest             | vest             | jacket                 | 6   | 0.013 | 0.239 | 0.748 | DS  |
| vomit crude      | puke             | throw up               | 61  | 0.005 | 0.4   | 0.595 | DS  |
| vomit neutral    | vomit            | throw up               | 44  | 0.003 | 0.1   | 0.897 | DS  |
| wardrobe         | wardrobe         | chifforobe             | 33  | 0.012 | 0.093 | 0.895 | DS  |
| warmed up        | leftovers        | warmed-overs           | 16  | 0     | 0.572 | 0.428 | FDS |
| washcloth        | washrag          | washcloth              | 16  | 0.174 | 0.235 | 0.591 | DS  |
| washpot          | washpot          | kettle                 | 30  | 0.239 | 0.195 | 0.566 | DS  |
| water in blister | water            | fluid                  | 13  | 0.016 | 0.305 | 0.679 | DS  |
| waterfall        | waterfall        | fall                   | 14  | 0.007 | 0.096 | 0.897 | DS  |
| weather boarding | weatherboarding  | siding(s)              | 30  | 0.041 | 0.098 | 0.861 | DS  |
| what time is it  | what time is it? | what time do you have? | 60  | 0     | 0.948 | 0.052 | FDS |
| wheat bread      | light bread      | bread                  | 35  | 0.372 | 0.33  | 0.298 | D   |
| wheelbarrow      | wheelbarrow      | wheelbar               | 17  | 0.012 | 0.146 | 0.842 | DS  |
| whetrock         | whetrock         | whetstone              | 42  | 0.018 | 0.152 | 0.83  | DS  |
| while            | while            | time                   | 8   | 0.08  | 0.184 | 0.736 | DS  |
| whinny           | nicker           | bray                   | 38  | 0.008 | 0.472 | 0.52  | DS  |
| whip             | whip             | switch                 | 15  | 0     | 0.594 | 0.406 | FDS |
| wild hog         | wild hog         | wild boar              | 49  | 0.024 | 0.29  | 0.686 | DS  |
| wire fence       | barbwire fence   | wire fence             | 34  | 0.002 | 0.046 | 0.951 | DS  |
| woman teacher    | teacher          | schoolteacher          | 29  | 0.054 | 0.126 | 0.82  | DS  |

|                 |                 |                |    |       |       |       |    |
|-----------------|-----------------|----------------|----|-------|-------|-------|----|
| yellow jaundice | yellow jaundice | jaundice       | 11 | 0.129 | 0.142 | 0.729 | DS |
| yolk            | yolk            | yellow (=yolk) | 10 | 0.056 | 0.122 | 0.822 | DS |



**Table S3. Top ten words by posterior probability for each model**

| <b>Drift</b>                       | <b>Frequency-dependent selection</b> | <b>Directional selection</b>    |
|------------------------------------|--------------------------------------|---------------------------------|
| 0237_LAGS_relatives (noun)         | 0305_LAGS_syrup (noun)               | 0223_LAGS_pulley_bone (noun)    |
| 0146_LAGS_hay_shed (noun)          | 0083_LAGS_died_crude (verb)          | 0240_LAGS_rheumatism (noun)     |
| 0199_LAGS_nice_day (expression)    | 0214_LAGS_poached_egg (noun)         | 0100_LAGS_field_patch (noun)    |
| 0174_LAGS_liver_pudding (noun)     | 0318_LAGS_towel (noun)               | 0272_LAGS_skunk (noun)          |
| 1062_LAMSAS_parlor (noun)          | 0133_LAGS_grits (noun)               | 1001_LAMSAS_a_little_ways (exp) |
| 0145_LAGS_have_a_calf (verb)       | 0334_LAGS_what_time_is_it (exp)      | 0045_LAGS_cemetery (noun)       |
| 0226_LAGS_push_the_baby (verb)     | 0258_LAGS_shafts (noun)              | 0342_LAGS_wire_fence (noun)     |
| 0173_LAGS_like_as_not (expression) | 1008_LAMSAS_biscuits (noun)          | 1033_LAMSAS_froze_over (verb)   |
| 0234_LAGS_rather (expression)      | 0304_LAGS_sycamore (noun)            | 0186_LAGS_merry_go_round (noun) |
| 1023_LAMSAS_cobbler (noun)         | 0013_LAGS_axle (noun)                | 0303_LAGS_sweet_potatoes (noun) |

Note: across all meanings, parts of speech do not differ significantly among the model

'winners' (the model with the highest posterior probability of a given meaning):  $\chi^2=7.8$ ,  $df=8$ ,

255  $p>0.45$

**Table S4 Delete and merge criteria**

| Reason for Filtering                                                  | Type   | Example                                                                | no. of occurrences | no. of meanings affected |
|-----------------------------------------------------------------------|--------|------------------------------------------------------------------------|--------------------|--------------------------|
| merging plurals                                                       | MERGE  | waterfalls -> waterfall<br>(0332_LAGS_waterfall)                       | 392                | 76                       |
| merging different verb tenses                                         | MERGE  | shelling, shelled -> shell<br>(0261_LAGS_shell_verb)                   | 274                | 78                       |
| merging different pronouns                                            | MERGE  | sure of yourself -> sure of himself<br>(0294_LAGS_stubborn)            | 16                 | 4                        |
| merging typos, incorrect or different spelling to correct form        | MERGE  | night miler -> night miller<br>(0037_LAGS_candle_fly)                  | 191                | 71                       |
| removing irrelevant context around concept                            | MERGE  | Bib apron, red apron -> apron<br>(0011_LAGS_apron)                     | 2286               | 363                      |
| removing articles (a, the)                                            | MERGE  | the daddy -> daddy<br>(0032_LAGS_bull)                                 | 92                 | 25                       |
| remove inappropriate word classes                                     | DELETE | greedy [adj.]<br>(0312_LAGS_tightwad)                                  | 193                | 19                       |
| removing inappropriate or incorrect response that doesn't fit concept | DELETE | delinquents<br>(0048_LAGS_children)                                    | 757                | 249                      |
| merging subtype or subcategory of main concept                        | DELETE | heater flue -> flue<br>(0289_LAGS_stovepipe_or_flue)                   | 24                 | 6                        |
| removing inappropriate non-English responses                          | DELETE | meulon (F)<br>(0146_LAGS_hay_shed)                                     | 8                  | 8                        |
| merging unnecessary brackets or implied context                       | MERGE  | rain shower (light) -> light rain shower<br>(0287_LAGS_steady_drizzle) | 143                | 51                       |

260

Note: The total number of filtering operations was 4376 or roughly 1% of the approximately 417,000 responses given for the 418 meanings.

265 **References**

1. Kretzschmar WA (1993 (2007)) *Handbook of the linguistic atlas of the Middle and South Atlantic States* (University of Chicago Press).
- 270 2. Davies M (2009) The 385+ million word Corpus of Contemporary American English (1990–2008+): Design, architecture, and linguistic insights. *International journal of corpus linguistics* 14(2):159-190.
3. Brysbaert M, Warriner AB, & Kuperman V (2014) Concreteness ratings for 40 thousand generally known English word lemmas. *Behavior research methods* 46(3):904-911.
- 275 4. Coltheart M (1981) The MRC psycholinguistic database. *The Quarterly Journal of Experimental Psychology* 33(4):497-505.
5. Kuperman V, Stadthagen-Gonzalez H, & Brysbaert M (2012) Age-of-acquisition ratings for 30,000 English words. *Behavior Research Methods* 44(4):978-990.
- 280 6. Beaumont MA (2010) Approximate Bayesian computation in evolution and ecology. *Annual Review of Ecology, Evolution and Systematics* 41(379-406):1.
7. Beaumont MA & Rannala B (2004) The Bayesian revolution in genetics. *Nature Reviews Genetics* 5(4):251-261.
8. Ohta T (1977) Extension to the neutral mutation random drift hypothesis. *Molecular evolution and polymorphism. National Institute of Genetics, Mishima, Japan*:148-167.
- 285 9. Beaumont MA, Cornuet J-M, Marin J-M, & Robert CP (2009) Adaptive approximate Bayesian computation. *Biometrika*:asp052.
